# Supplementary material
Source: publisher site journal article supplement (https://www.dovepress.com/article/573349)

**Supplementary Material**

**Fig. S1.** H & E staining images of the main organs of mice in each group after the end of treatment.


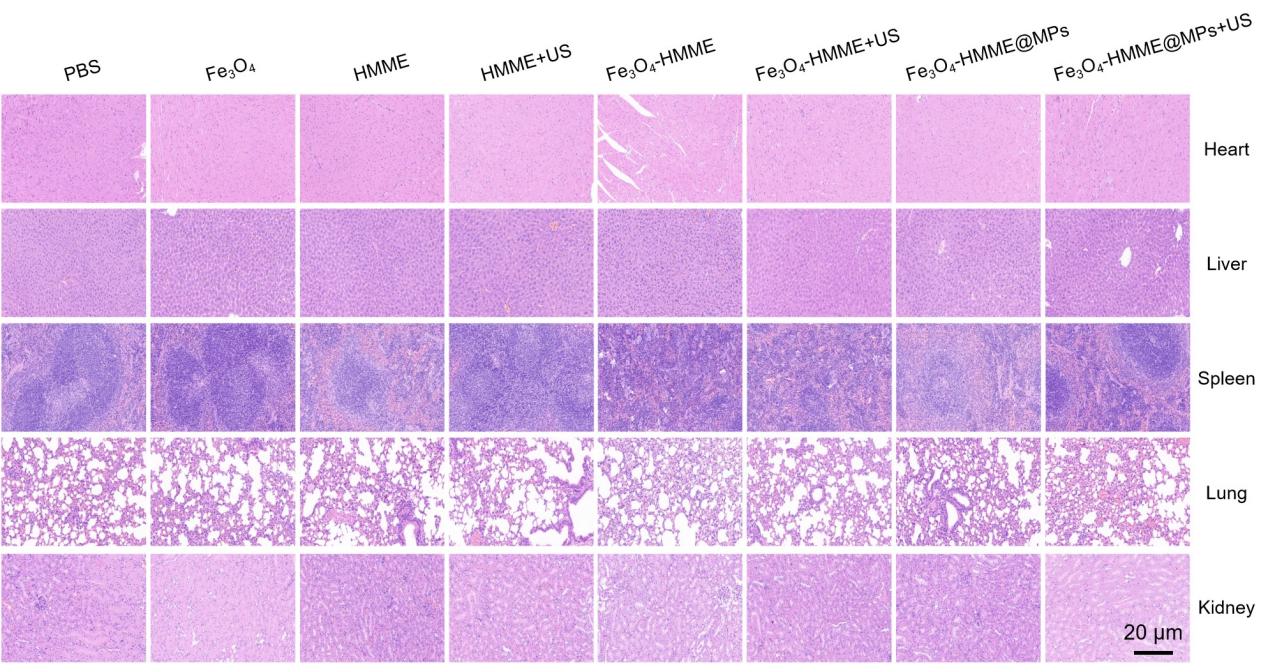

Supplement: Supplementary file 1 [file 573349%20Revised%20%2509Supplementary%20Material.docx]
